# Supplementary material
Source: MDPI journal article supplement (https://www.mdpi.com/2071-1050/16/1/366)
Supplement: s1 [file s1]

**Caption of Supplementary data:**

Table S1 Physicochemical characteristics of biochar.

Table S2 Physicochemical characteristics of soil used in this work.

Figure S1. Physiochemical properties of biochar: Scanning Electron Microscope (SEM) images (a), the organic functional groups on the surface of biochar (b), elemental analysis (c).

Table S1 Physicochemical characteristics of biochar

| Parameters                                   | Biochar |
|----------------------------------------------|---------|
| pH                                           | 8.18    |
| C                                            | 84.8%   |
| H                                            | 1.2%    |
| O                                            | 12.0%   |
| N                                            | 1.0%    |
| S                                            | 1.0%    |
| H/C                                          | 0.014   |
| O/C                                          | 0.142   |
| Particle size (mm)                           | 2-5     |
| BET surface area (m <sup>2</sup> /g)         | 9.17    |
| t-Plot micropore area (m <sup>2</sup> /g)    | 6.28    |
| t-Plot micropore volume (cm <sup>3</sup> /g) | 0.0026  |

Table S2 Physicochemical characteristics of soil used in this work

|                         |            |
|-------------------------|------------|
| Depth (cm)              | 0-20       |
| pH                      | 9.0        |
| Clay (%)                | 5.9        |
| Silt (%)                | 87.8       |
| Sand (%)                | 6.3        |
| Textural classification | Silty loam |
| organic matter (%)      | 3.52       |
| Water content (%)       | 23.8       |

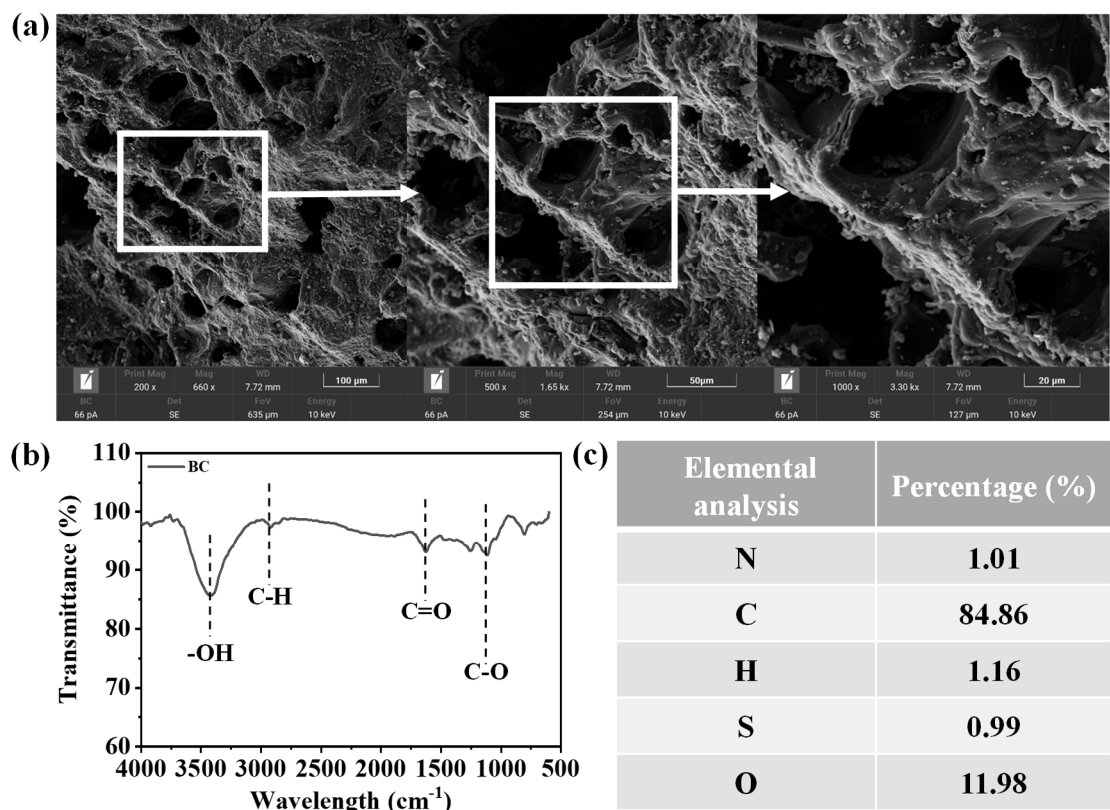

Figure S1. Physiochemical properties of biochar: Scanning Electron Microscope (SEM) images (a), the organic functional groups on the surface of biochar (b), elemental analysis (c)
